# Supplementary material
Source: PubMed Central journal article supplement (PMC1271749)
Supplement: 7600039s1.pdf [file 7600039s1.pdf]

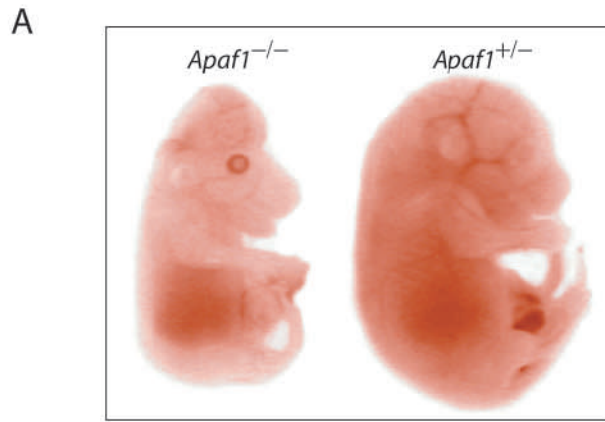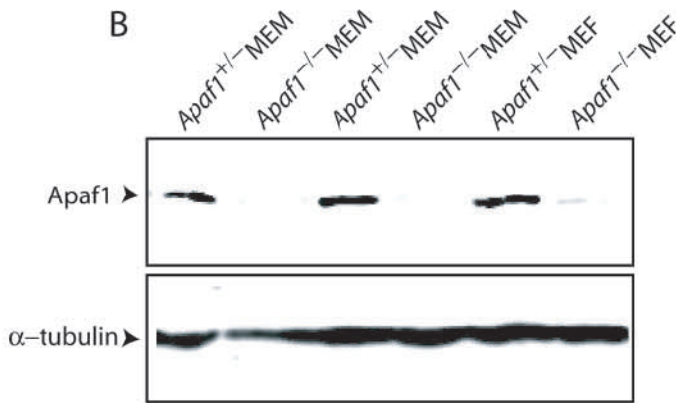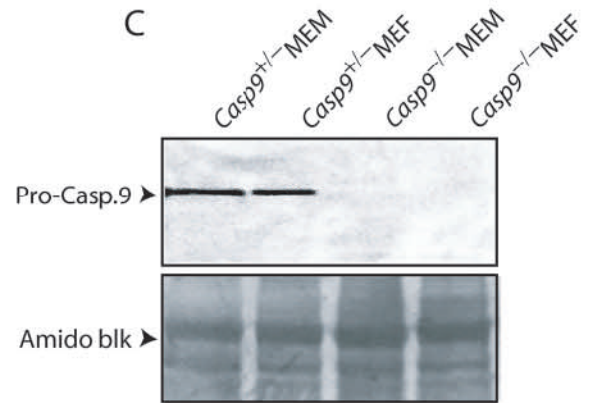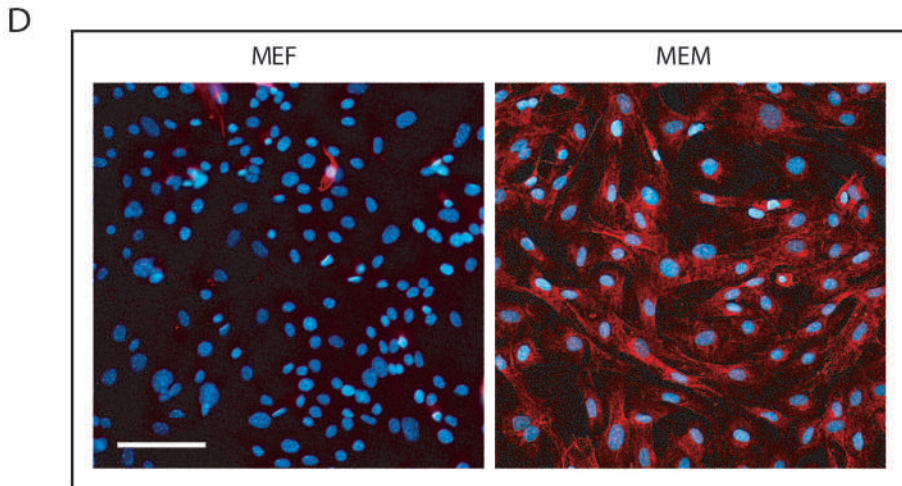

Fig. S1. Generation and characterization of primary myoblasts. (A) Example of E16.5 *Apaf1*<sup>-/-</sup> embryo and control littermate used to isolate primary myoblasts. (B-C) Western blot analysis of primary mouse embryonic myoblast (MEM) and fibroblast (MEF) cultures with antibodies against Apaf1 or Caspase-9. (D) Representative immunohistochemistry analysis of primary fibroblasts and myoblasts with desmin, a myoblast marker (red). Nuclei were visualized by Hoechst staining (blue). Bar = 100  $\mu$ m.
