# Supplementary material
Source: PubMed Central journal article supplement (PMC1271749)
Supplement: 7600039s3.pdf [file 7600039s3.pdf]

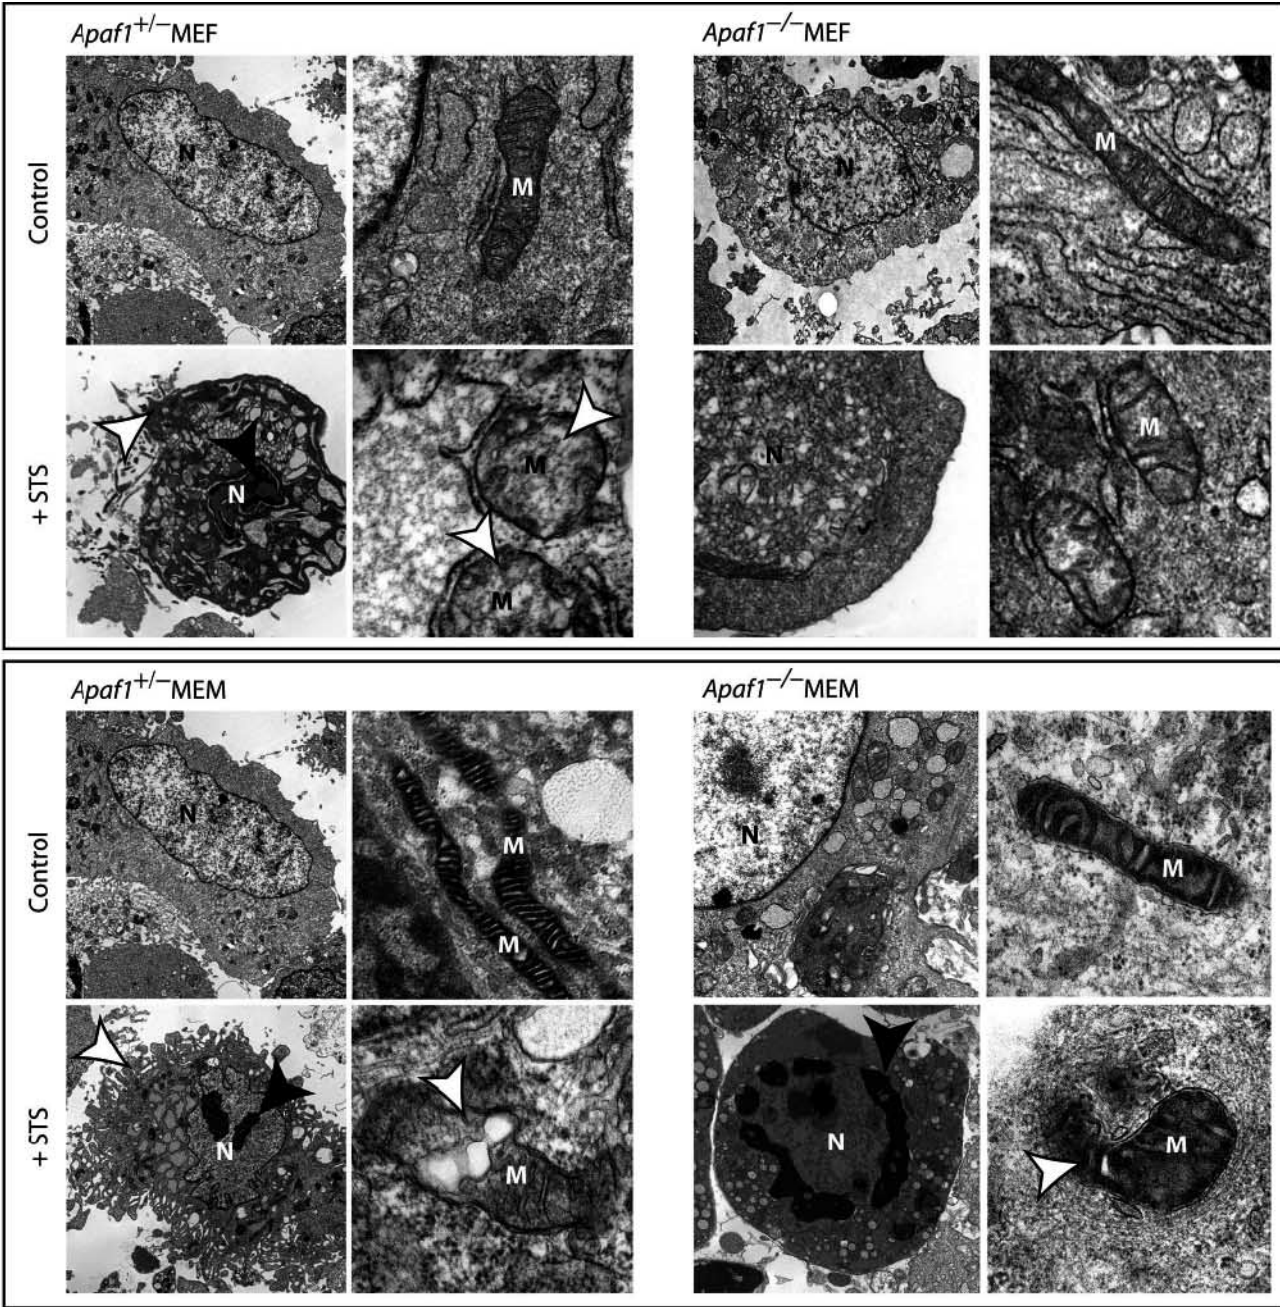

Figure S3. Electron microscopy analysis of *Apaf1*-deficient and control myoblasts and fibroblasts. Indicated primary cultures treated with staurosporin or vehicle alone were subject to EM analysis. Black and white arrowheads point to nuclear condensation and ruptured mitochondria, respectively.
